# Supplementary material
Source: publisher site journal article supplement (https://www.dovepress.com/article/448321)
Supplement: Supplementary file 1 [file get_supplementary_file.php]

**SUPPLEMENTARY FIGURES**


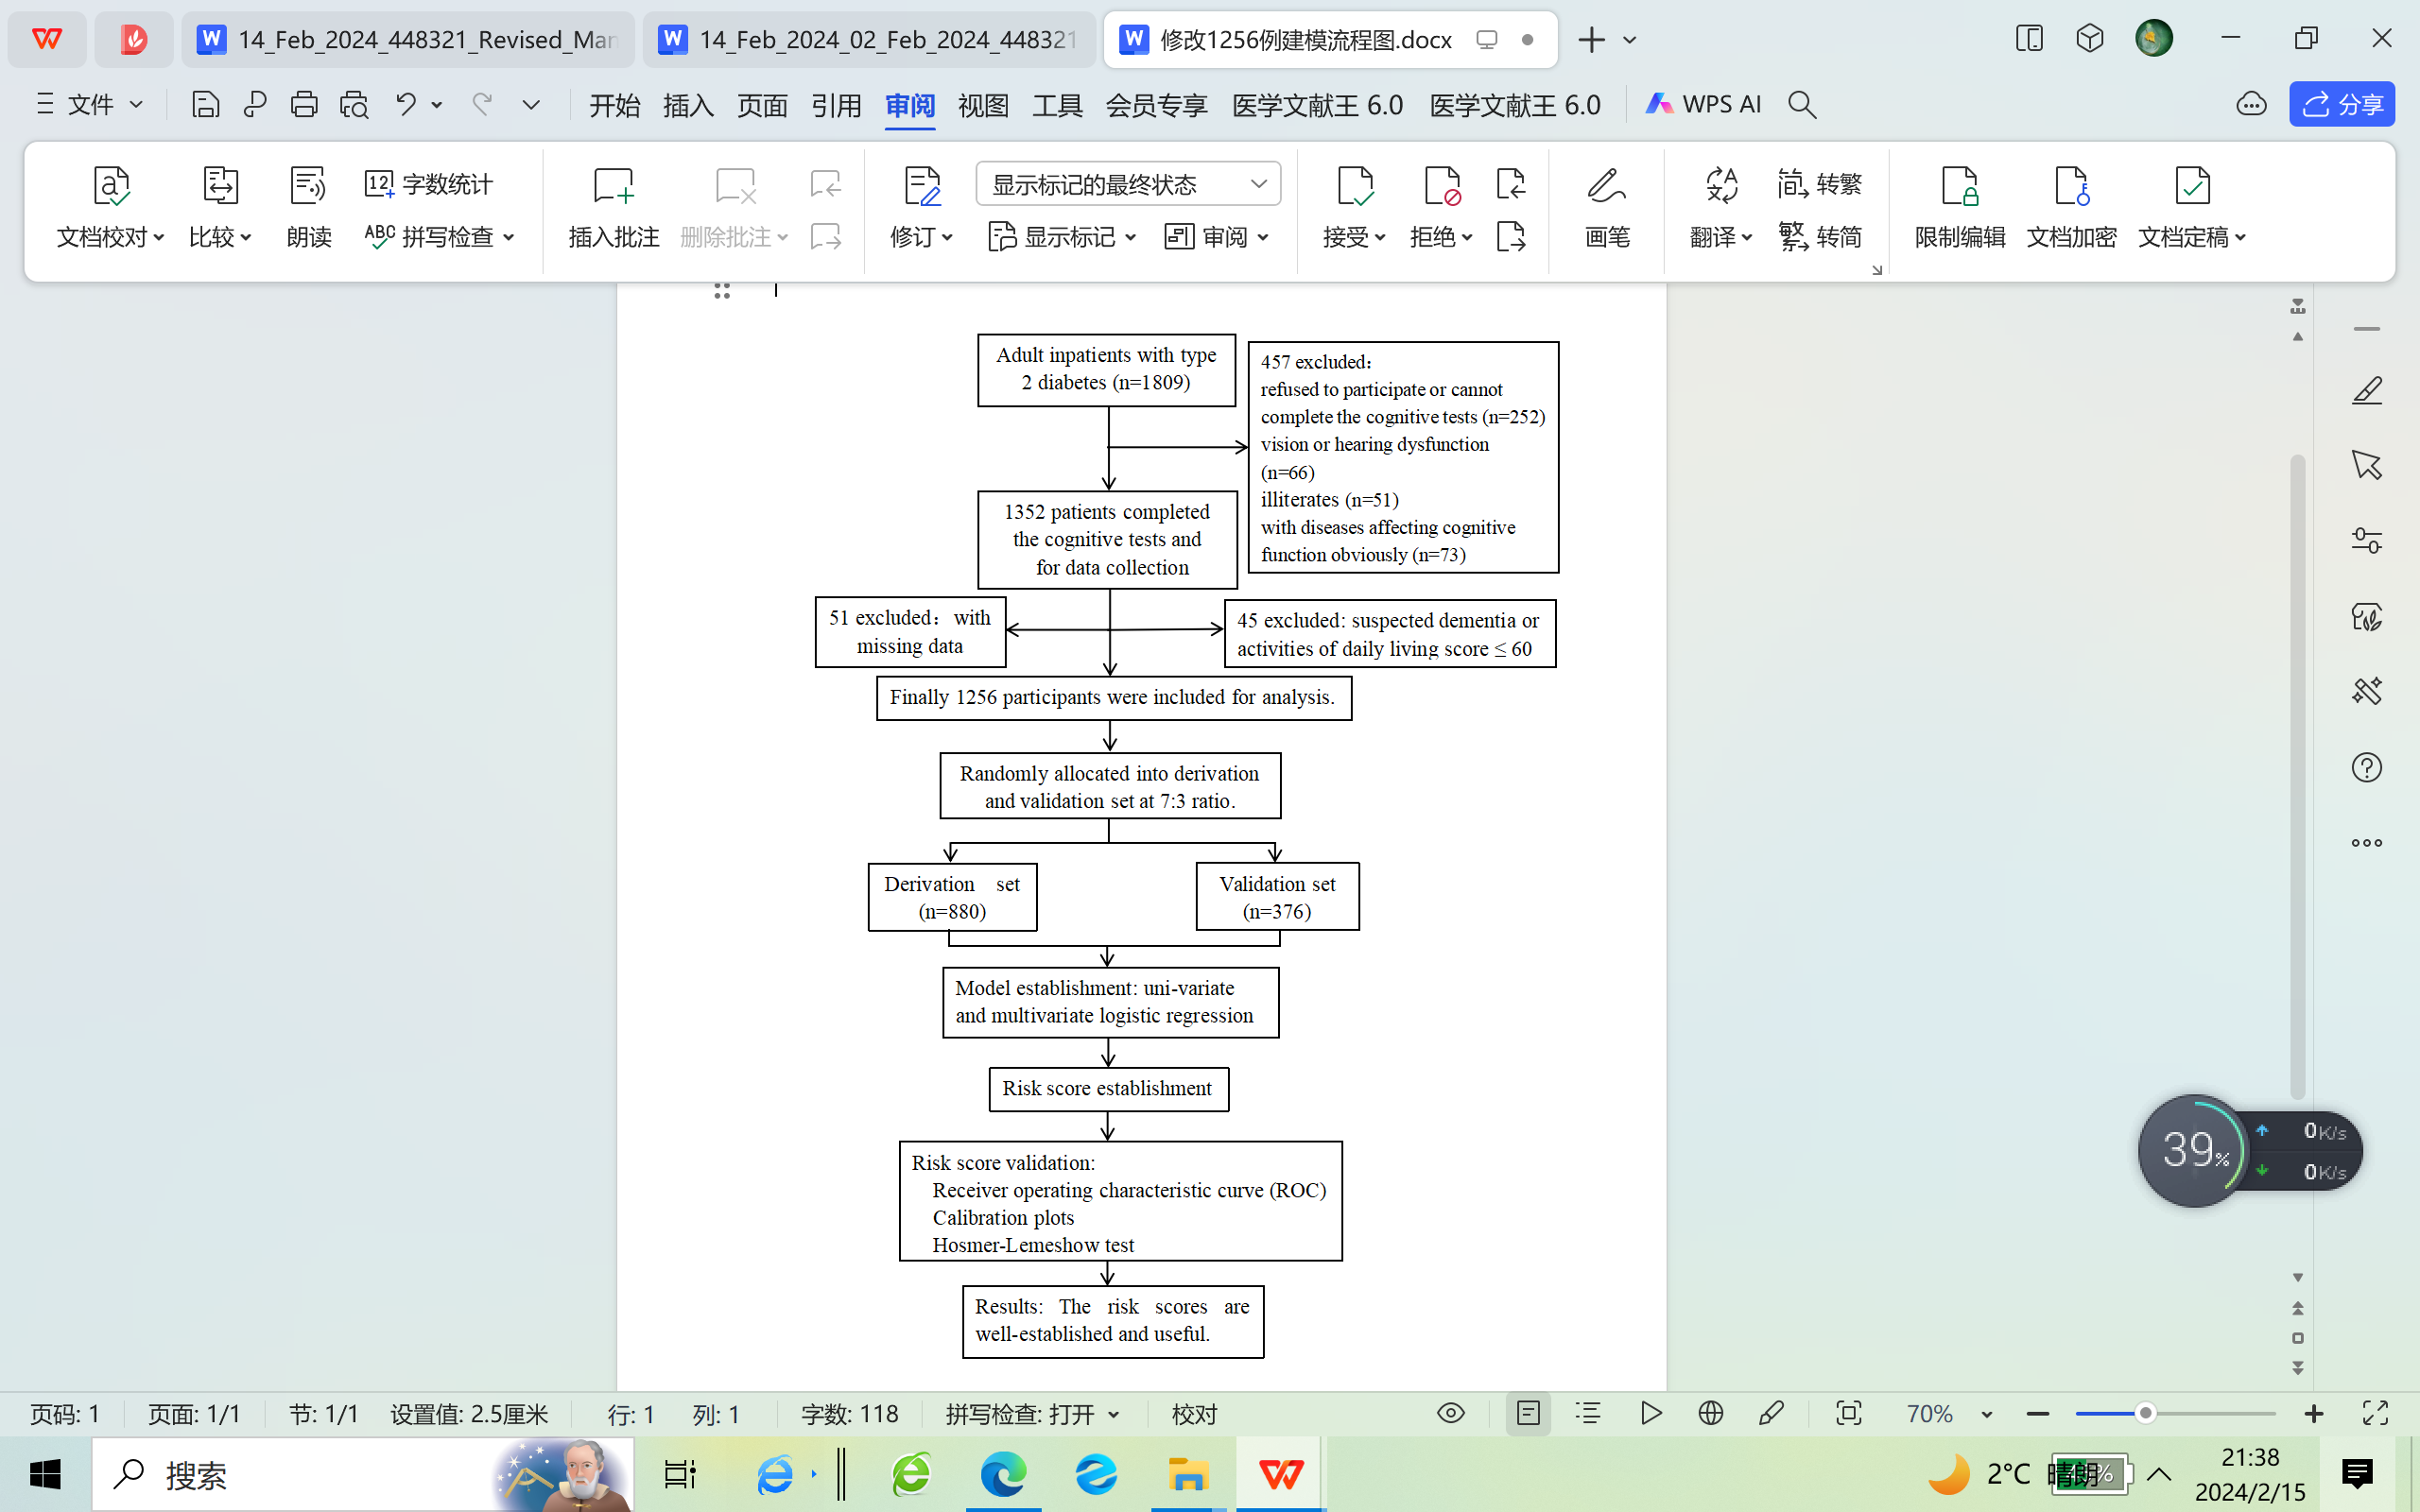


**Supplementary Figure 1** Flowchart of the study.


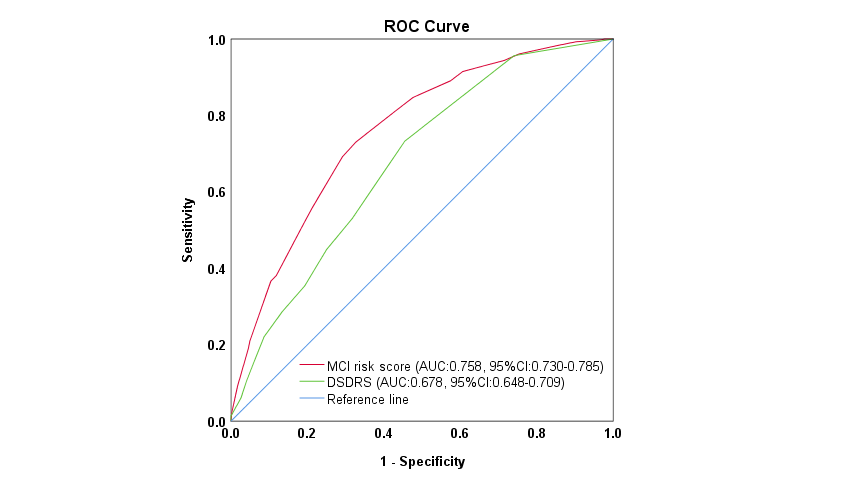


**Supplementary Figure 2** Area under the receiver-operating characteristic curve (AUC) of the MCI risk score and the diabetes specific dementia risk score (DSDRS) in 1256 patients with diabetes.


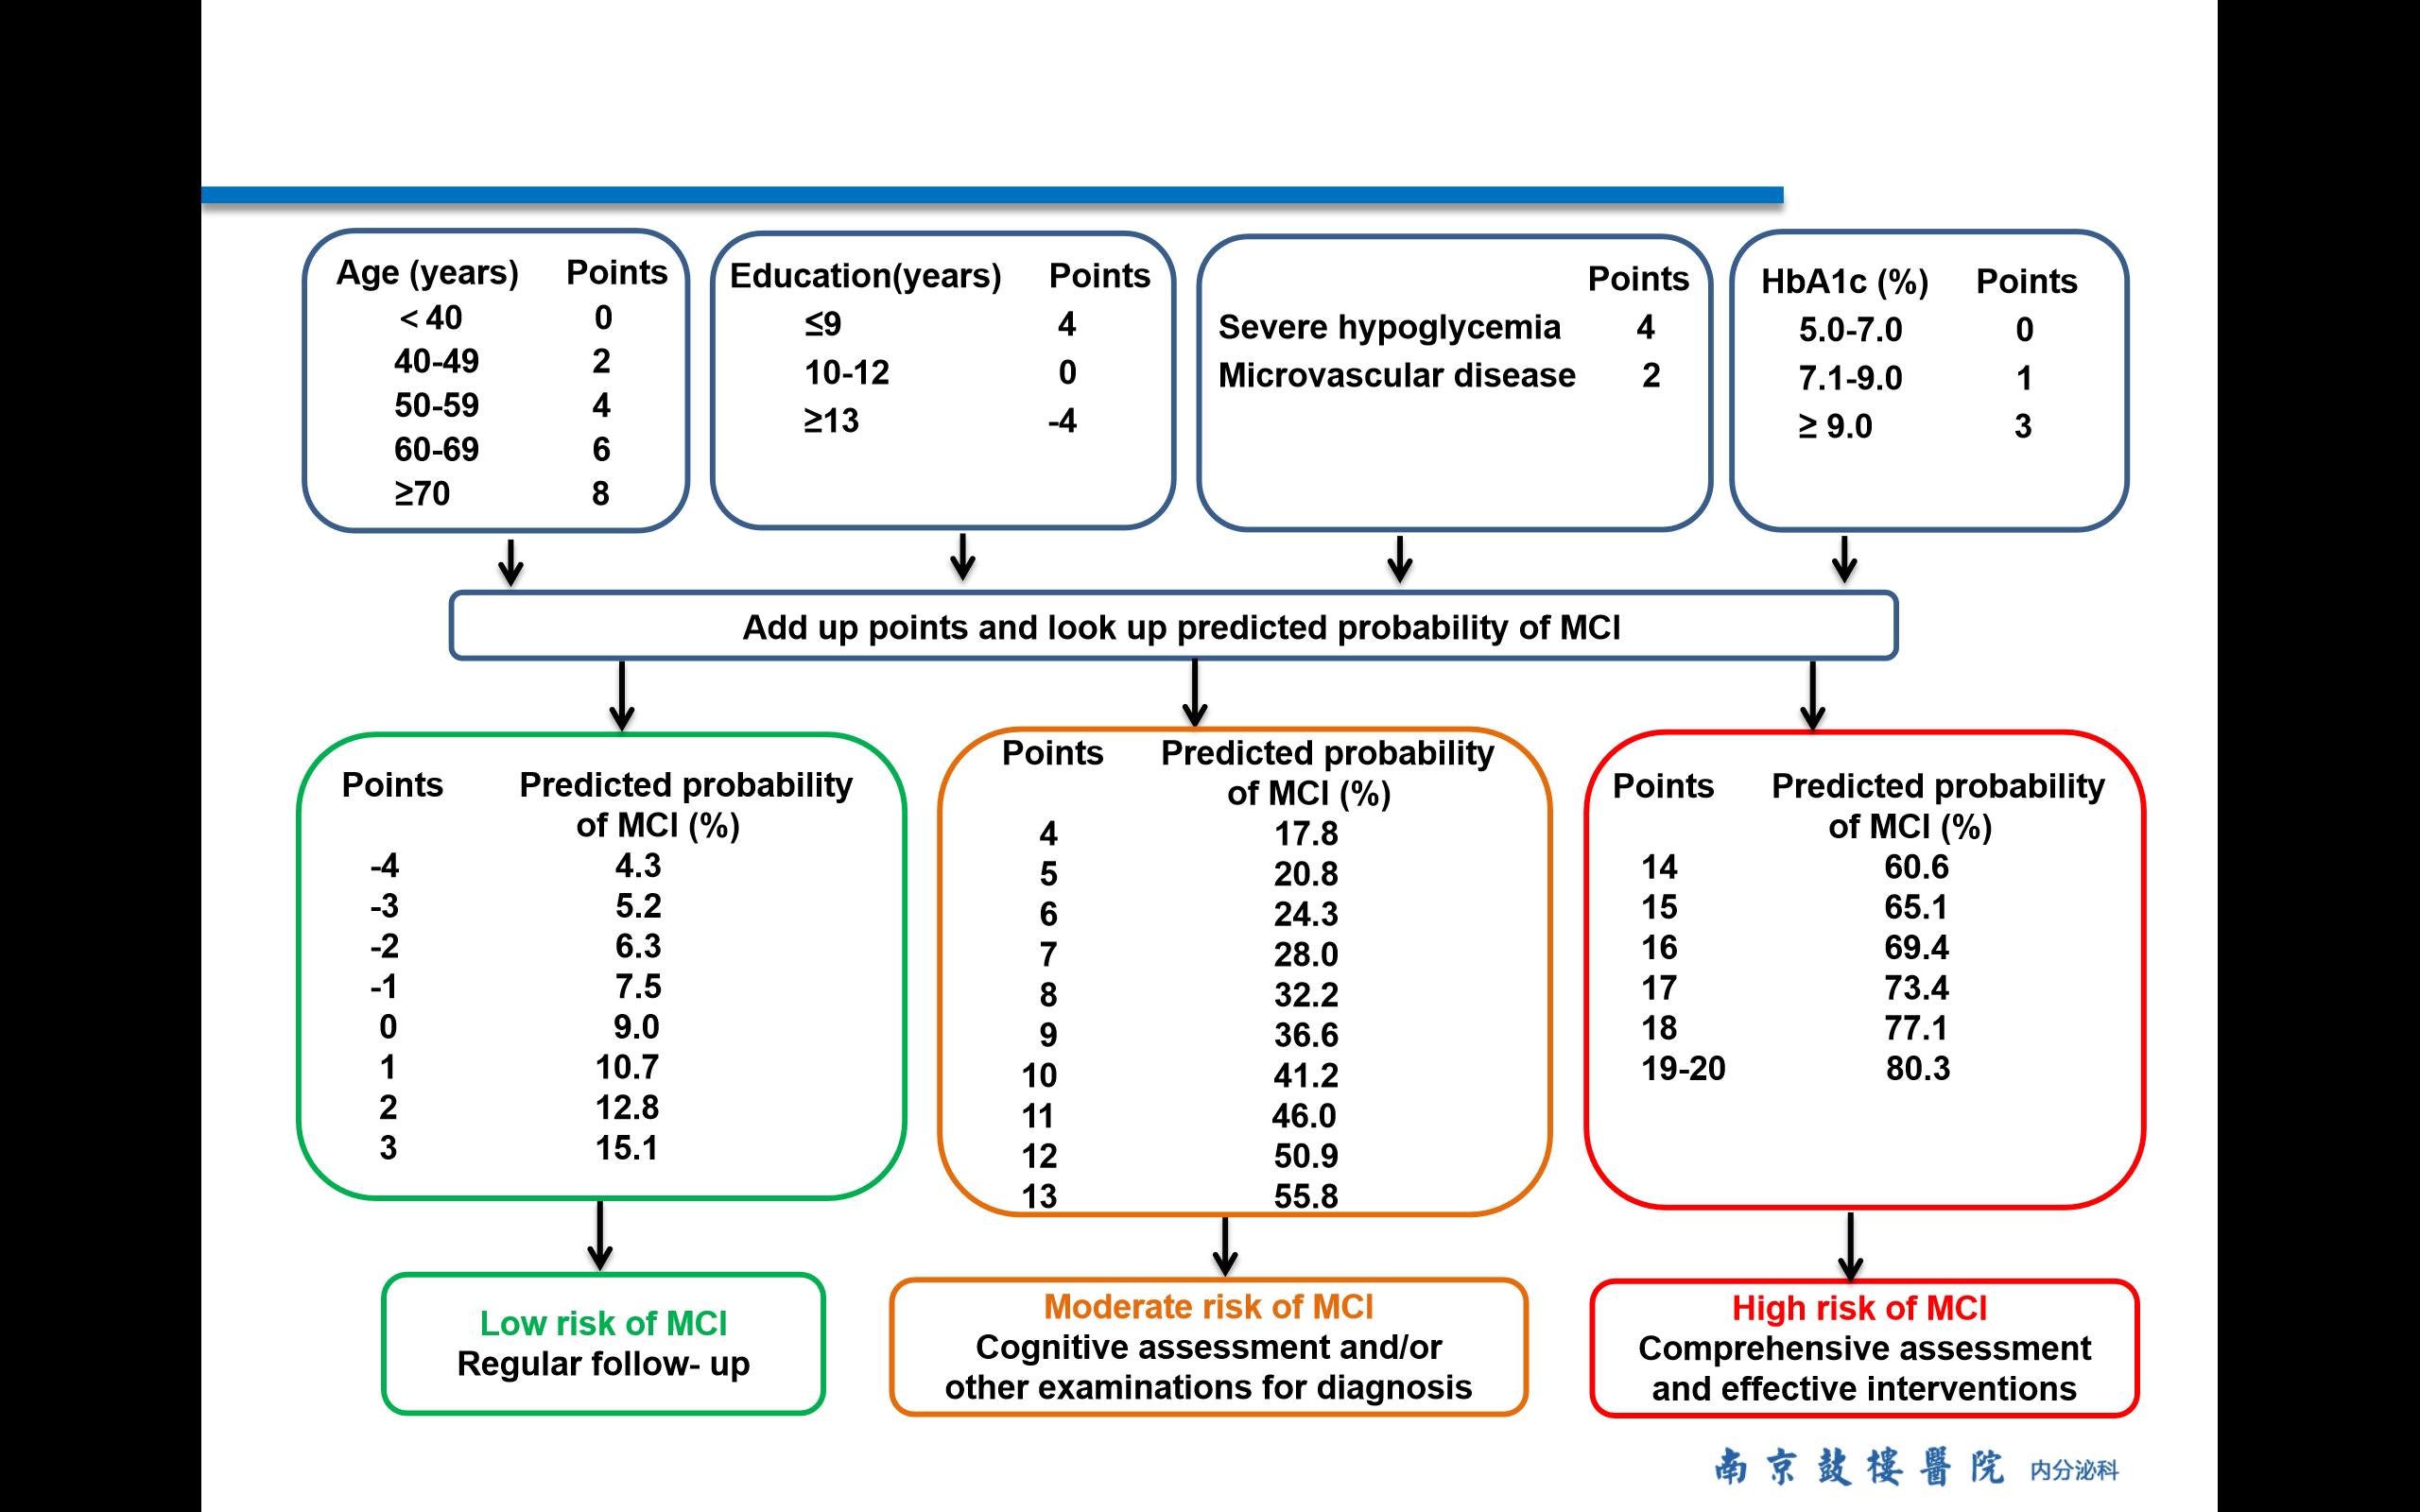


**Supplementary Figure 3** Flowchart of summary of the diabetes specific MCI risk score.

Abbreviations: HbA1c, hemoglobin A1c; MCI, mild cognitive impairment.

**Supplementary Table 1** The stepsfor risk score construction.

| Risk factor | Categories | Reference value (*Wij*) | *βi* | *βi(Wij-WiREF)* | Points*ij=*  *βi(Wij-WiREF)/B* | Integer Points |
| --- | --- | --- | --- | --- | --- | --- |
| Age (years) |  |  | 0.048 |  |  |  |
|  | ＜40* | 33.5=*W1REF* |  | 0 | 0 | 0 |
|  | 40-49 | 44.5 |  | 0.528 | 2.2 | 2 |
|  | 50-59 | 54.5 |  | 1.008 | 4.2 | 4 |
|  | 60-69 | 64.5 |  | 1.488 | 6.2 | 6 |
|  | ≥70* | 75.0 |  | 1.992 | 8.3 | 8 |
| Education  (years) |  |  | -0.178 |  |  |  |
|  | ≤9* | 6 |  | 0.890 | 3.7 | 4 |
|  | 10-12 | 11=*W2REF* |  | 0 | 0 | 0 |
|  | ＞12* | 16 |  | -0.890 | -3.7 | -4 |
| HbA1c (%) |  |  | 0.126 |  |  |  |
|  | 5.0-7.0 | 6.00=*W3REF* |  | 0 | 0 | 0 |
|  | 7.1-9.0 | 8.05 |  | 0.258 | 1.1 | 1 |
|  | ＞9.0* | 12.05 |  | 0.762 | 3.2 | 3 |
| Microvascular disease |  |  | 0.533 |  |  |  |
|  | No | 0=*W4REF* |  | 0 | 0 | 0 |
|  | Yes | 1 |  | 0.533 | 4.0 | 4 |
| Self-reported  history of severe hypoglycemia |  |  | 0.963 |  |  |  |
|  | No | 0=*W5REF* |  | 0 | 0 | 0 |
|  | Yes | 1 |  | 0.963 | 2.2 | 2 |

Note：

*Wij=*the middle value in the group.

*To determine the reference values (*Wij*) for the first and last categories of age, education and HbA1c, we use the 1st percentile and the 99th percentile to minimize the influence of extreme values.

B=5*βage*=5×0.048=0.24.

**SUPPLEMENTARY TABLES**

**Supplementary Table 2** The sensitivity and specificity of the MCI risk score at the two cut-off points in the derivation and validation set

| Cut-off | Predicted probability of MCI (%) | Derivation set | | | | Validation set | | | |
| --- | --- | --- | --- | --- | --- | --- | --- | --- | --- |
| Sensitivity(%) | Specificity(%) | PPV  (%) | NPV  (%) | Sensitivity  (%) | Specificity (%) | PPV  (%) | NPV  (%) |
| 4 | 17.8 | 92.3 | 38.0 | 41.6 | 91.1 | 89.8 | 42.6 | 44.4 | 89.1 |
| 14 | 60.6 | 21.4 | 94.5 | 64.9 | 71.5 | 20.5 | 96.4 | 74.3 | 70.4 |

**Abbreviations:** MCI, mild cognitive impairment; PPV, positive predictive value; NPV, negative predictive value.

**Supplementary Table 3** Binary logistic regression analysis of MCI in T2DM patients in different risk score groups in the derivation set

| Variable | Groups | T2DM-CN  n (%) | T2DM-MCI  n (%) | β | OR (95%CI) | P-value |
| --- | --- | --- | --- | --- | --- | --- |
| MCI risk score | low-score (≤3) | 226 (91.1) | 22 (8.9) | - | 1.00 | ＜0.001 |
|  | medium-score (4-13) | 336 (62.5) | 202 (37.5) | 1.821 | 6.18 (3.86, 9.89) | ＜0.001 |
|  | high-score (≥14) | 33 (35.1) | 61 (64.9) | 2.944 | 18.99 (10.33, 34.92) | ＜0.001 |

**Abbreviations:** T2DM, type 2 diabetes mellitus; CN, cognitively normal; MCI, mild cognitive impairment; OR, odds ratio, CI, confidence interval.
